# Supplementary material
Source: publisher site journal article supplement (https://www.dovepress.com/article/405580)
Supplement: Supplementary file 1 [file get_supplementary_file.php]

Supplementary Table1 Demographic and basic data of the participants and associations with SCL-90 score

| Variables | | N(%) | SCL-90 | F/t |
| --- | --- | --- | --- | --- |
| Gender | Male | 94(29.56) | 1.81±0.77 | 0.37 |
| Female | 224(70.44) | 1.76±0.67 |
| Age(years) | 21 | 98(30.82) | 1.87±0.81 | 1.31 |
| 20 | 123(38.68) | 1.75±0.63 |
| 19 | 63(19.81) | 1.82±0.66 |
| 18 | 28(8.81) | 1.58±0.73 |
| 17 | 6(1.89) | 1.51±0.38 |
| No siblings | Yes | 87(27.36) | 1.68±0.66 | 2.43 |
| No | 231(72.64) | 1.82±0.71 |
| Parents alive | Yes | 309(97.17) | 1.77±0.67 | 1.26 |
| No | 9(2.83) | 2.03±1.48 |
| Marital status | Yes | 239(75.16) | 1.76±0.66 | 0.36 |
| No | 79(24.84) | 1.82±0.83 |
| Lack of love experience | Yes | 168(52.83) | 1.72±0.58 | 2.65 |
| No | 150(47.17) | 1.85±0.81 |
| Frequency of stay up late | Hardly ever | 20(6.29) | 1.74±0.72 | 1.77 |
| 1–3 times a week | 32(10.06) | 1.79±0.70 |
| 1–2 times a week | 89(27.98) | 1.71±0.66 |
| 3–5 times a week | 65(20.44) | 1.98±0.78 |
| Almost everyday | 112(35.23) | 1.72±0.67 |
| Sleep quality | Excellent | 46(14.47) | 1.49±0.60 | 15.08*** |
| Good | 216(67.92) | 1.73±0.64 |
| Poor | 47(14.78) | 2.06±0.72 |
| Insomnia | 9(2.83) | 2.92±1.08 |
| Regular diet | Yes | 259(81.45) | 1.64±0.62 | 62.82*** |
| No | 59(18.55) | 2.37±0.73 |
| Exercise frequency | Almost everyday | 30(9.43) | 1.67±0.76 | 1.52 |
| 3–5 times a week | 66(20.76) | 1.71±0.73 |
| 1–2 times a week | 83(26.10) | 1.76±0.63 |
| 1–3 times a week | 70(22.01) | 1.73±0.64 |
| Hardly ever | 69(21.70) | 1.95±0.77 |
| Exercise duration | <20min | 140(44.03) | 1.87±0.65 | 1.91 |
| 20–29min | 83(26.10) | 1.71±0.71 |
| 30–59min | 57(17.92) | 1.72±0.71 |
| 1–2h | 32(10.06) | 1.58±0.65 |
| >2h | 6(1.89) | 2.17±1.42 |

Notes:*** *p*<0.001.

Supplementary Table 2 Comparison between SCL-90 score of medical students and the national college student norm

| Dimension | Participants (n=318) | Norm (n=2685) | t | *p* |
| --- | --- | --- | --- | --- |
| Obsession (10) | 2.08±0.74 | 2.03±0.66 | 1.303 | 0.194 |
| Interpersonal sensitivity (9) | 2.00±0.78 | 1.92±0.65 | 1.750 | 0.081 |
| Depression (13) | 1.87±0.77 | 1.91±0.54 | -0.865 | 0.388 |
| Anxiety (10) | 1.73±0.78 | 1.68±0.23 | 1.213 | 0.226 |
| Psychosis (10) | 1.69±0.72 | 1.61±0.58 | 2.044 | 0.042 |
| Phobic anxiety (7) | 1.67±0.77 | 1.54±0.56 | 3.153 | 0.002 |
| Paranoia (6) | 1.66±0.73 | 1.84±0.63 | -4.420 | <0.001 |
| Hostility (6) | 1.65±0.74 | 1.73±0.69 | -1.940 | 0.053 |
| Somatization (12) | 1.60±0.72 | 1.57±0.55 | 0.762 | 0.447 |
| Total score 90 | 1.78±0.70 | 1.63±0.51 | 3.762 | <0.001 |
